# Supplementary material
Source: MDPI journal article supplement (https://www.mdpi.com/2227-9717/5/4/58)
Supplement: s1 [file s1]

## Supplementary material:

# A reaction database for small molecule pharmaceutical processes integrated with process information

Emmanouil Papadakis<sup>1</sup>, Amata Anantpinijwtana<sup>1</sup>, John M. Woodley<sup>1</sup> and Rafiqul Gani<sup>1,\*</sup>

<sup>1</sup> Department of Chemical and Biochemical Engineering, Technical University of Denmark, DK-2800, Kgs. Lyngby, Denmark

\* Correspondence: rag@kt.dtu.dk; Tel.: + 45 45 25 28 82

## A. Reaction pathway

### A.1 Pathway 1: BHC Ibuprofen synthesis

The reactive pathway is illustrated in Figure A.1:

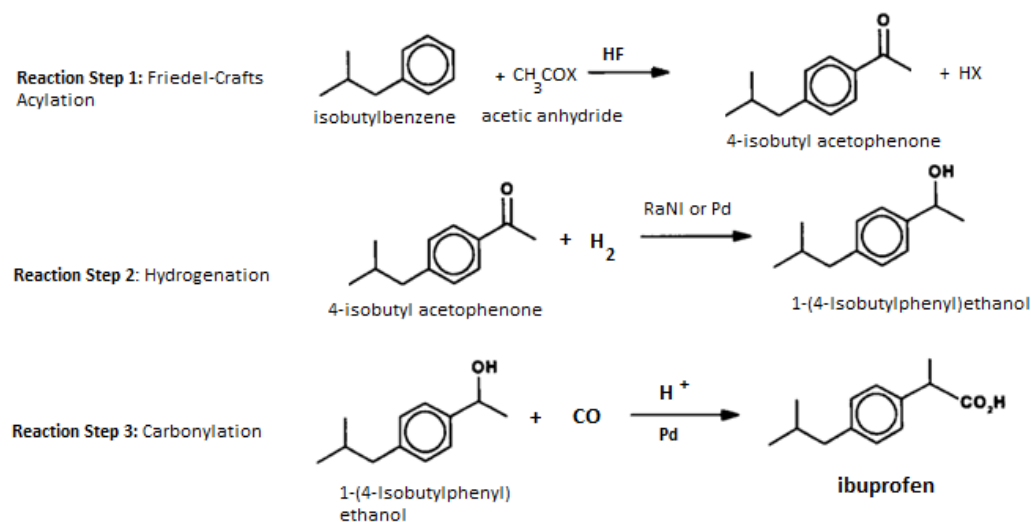

Figure A.1 BHC reaction pathway, obtained from Elango et al.

14 The reaction information, together with the solvent and catalyst data are given in Table A.1.

15

16 **Table A.1** Reaction information as retrieved from the database

| Reaction information                               | Friedel Crafts (batch)                                              | Friedel Crafts (flow)                                                                      | Hydrogenation                                                     | Carbonylation                           |
|----------------------------------------------------|---------------------------------------------------------------------|--------------------------------------------------------------------------------------------|-------------------------------------------------------------------|-----------------------------------------|
| Reaction                                           | Isobutylbenze + Acetic anhydride→4 isobutylacetophenone+acetic acid | Isobutylbenze + acetylating agent (AcF+AcAc)→4 isobutylacetophenone+ H <sub>2</sub> O + HF | 4 isobutylacetophenone + H <sub>2</sub> → isobutyl phenyl ethanol | isobutyl phenyl ethanol + CO →Ibuprofen |
| Composition (Reactant A: Reactant B, in moles eq.) | 1:2                                                                 | 1:2                                                                                        | 1:1                                                               | 1:1                                     |
| Solvent                                            | HF                                                                  | HF                                                                                         | -                                                                 | -                                       |
| Catalyst                                           | HF                                                                  | HF                                                                                         | Rakey Nickel                                                      | Pd                                      |
| By Products                                        | Not reported                                                        | Not reported                                                                               | Isobutyl ethyl benzene                                            | 3IPPA;IBS;HE                            |

17

18

19 The reaction conditions for the reactions in BHC ibuprofen synthesis are given in Table A.2:

20 **Table A.2** Reaction Conditions for the reactive steps

| Reaction Conditions | Friedel Crafts (batch) | Friedel Crafts (flow) | Hydrogenation       | Carbonylation                                                              |
|---------------------|------------------------|-----------------------|---------------------|----------------------------------------------------------------------------|
| Temperature         | 80°C                   | 60-70 °C              | 70 °C               | 130 °C                                                                     |
| Pressure            | 10 atm                 | 10 atm                | 6.89 atm            | 165atm                                                                     |
| Time                | 3hr                    | 2hr                   | 3hr                 | 2.6 hr                                                                     |
| Catalyst amount     | 50eq. HF               | 50eq. HF              | 0.3eq. Rakey Nickel | 0.007 mol%<br>PdCl <sub>2</sub> , ligand:<br>0.08 mol%<br>PPh <sub>3</sub> |
| Solvent amount      | 50eq. HF               | 50eq. HF              | -                   | -                                                                          |

21

22 The available experimental data is given in Table A.3.

23 **Table A.3** Available experimental data as retrieved from the database

| Type of Data                              | Friedel Crafts (batch)  | Friedel Crafts (flow)   | Hydrogenation                           | Carbonylation                                 |
|-------------------------------------------|-------------------------|-------------------------|-----------------------------------------|-----------------------------------------------|
| Conversion                                | 85%                     | 77%                     | >99%                                    | 99%                                           |
| Selectivity(Main Product;<br>By-products) | 81%                     | 100%                    | 98.5%; 1.5%(by product)                 | 96.6%; 1.0%;<br>0.00%; 0.8%                   |
| Reaction Yield                            | -                       | 77%                     | -                                       | -                                             |
| Process Yield                             | -                       | 90%                     | -                                       | -                                             |
| Experimental                              | Starting and end points | Starting and end points | Starting and end points                 | Starting and<br>end points                    |
| Model                                     | no                      | no                      | Yes (parameter estimation<br>is needed) | Yes<br>(parameter<br>estimation is<br>needed) |

24

### A.1 Pathway 3: Bogdan et al. Ibuprofen Synthesis

The Bogdan Ibuprofen synthesis consist of three reactive steps, the first one is a Friedel Crafts acylation of IBB with propionic acid, the second one is an aryl migration step using TMOF and finally a saponification step to produce the ibuprofen salt.

#### Reaction 1. Friedel Crafts acylation

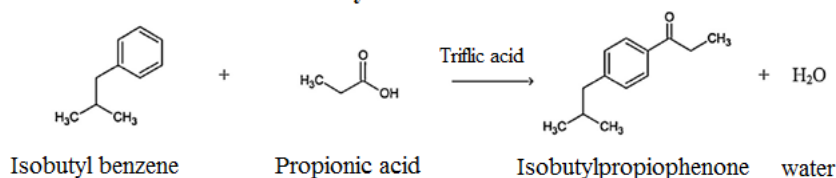

#### Reaction 2. Aryl Migration

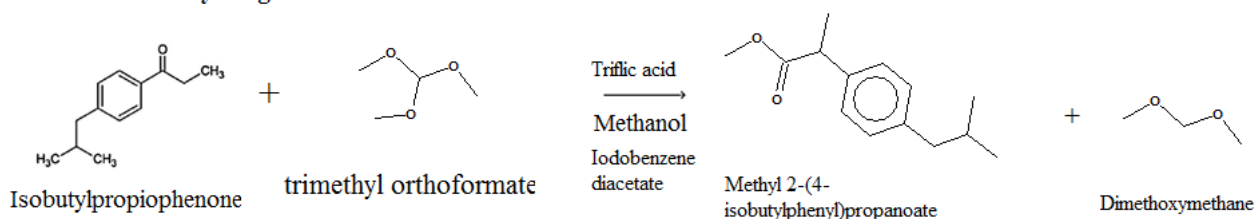

#### Reaction 3. Saponification

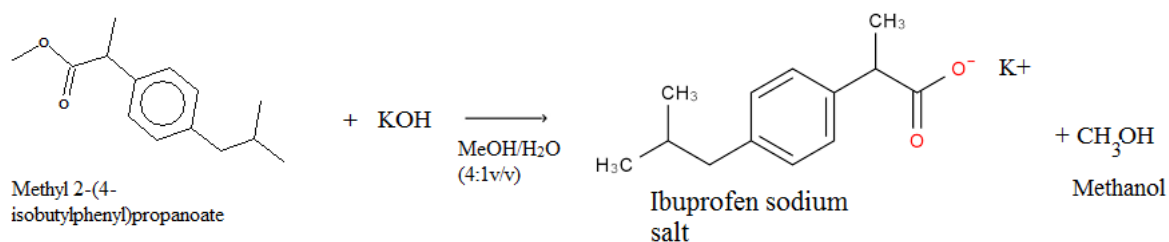

**Figure A.2** Bogdan et al reaction pathway for the ibuprofen synthesis, obtained from Bogdan et al.

The reaction conditions for the reaction in Bogdan ibuprofen synthesis are listed in Table A.5.

**Table A.4** Reaction information retrieved from the database

| Reaction information                               | Friedel Crafts (flow)                                                 | Aryl Migration (flow)                                                                                          | Saponification (flow)                                                             |
|----------------------------------------------------|-----------------------------------------------------------------------|----------------------------------------------------------------------------------------------------------------|-----------------------------------------------------------------------------------|
| Reaction                                           | Isobutylbenzene + Propionic acid → 4'-Isobutylpropionophenone + water | 4'-Isobutylpropionophenone + trimethyl orthoformate → Methyl-2-(4-isobutylphenyl)propanoate + Dimethoxymethane | Methyl-2-(4-isobutylphenyl)propanoate + KOH → Ibuprofen-K <sup>+</sup> + methanol |
| Composition (Reactant A: Reactant B, in moles eq.) | 1:1                                                                   | 1:4                                                                                                            | 1:20                                                                              |
| Solvent                                            | -                                                                     | MeOH                                                                                                           | MeOH/H <sub>2</sub> O                                                             |
| Catalyst                                           | Triflic acid                                                          | 1 eq. Iodobenzene diacetate                                                                                    | -                                                                                 |
| Acid/Base                                          | 5eq. Triflic acid                                                     | 5eq. Triflic acid                                                                                              | -                                                                                 |
| By Products                                        | -                                                                     | -                                                                                                              | -                                                                                 |

The available experimental data is given in Table A.6.

**Table A.5** Reaction Conditions for the three reactive steps

| Reaction Conditions | Friedel Crafts (flow) | Aryl Migration (flow)       | Saponification (flow)          |
|---------------------|-----------------------|-----------------------------|--------------------------------|
| Temperature         | 150 °C                | 50 °C                       | 65 °C                          |
| Pressure            | 1 atm                 | 1 atm                       | 1 atm                          |
| Time                | 10 min                | 2 min                       | 3 min                          |
| Catalyst amount     | Triflic acid          | 1 eq. Iodobenzene diacetate | -                              |
| Solvent amount      | -                     | 32eq. MeOH                  | MeOH/H <sub>2</sub> O (4:1v/v) |

The available experimental data is given in Table A.7.

**Table A.6** Available experimental data retrieved from the database

| Type of Data                           | Friedel Crafts (flow)               | Aryl Migration (flow)               | Saponification (flow)               |
|----------------------------------------|-------------------------------------|-------------------------------------|-------------------------------------|
| Conversion                             | 92%                                 | 98%                                 | 99%                                 |
| Selectivity(Main Product; By-products) | -                                   | -                                   | -                                   |
| Reaction Yield                         | -                                   | -                                   | -                                   |
| Experimental                           | Steady state data for different tau | Steady state data for different tau | Steady state data for different tau |
| Model                                  | no                                  | no                                  | no                                  |
